# Supplementary material
Source: PubMed Central journal article supplement (PMC3184359)
Supplement: NIHMS285500-supplement-01.pdf [file NIHMS285500-supplement-01.pdf]

Table 1. Formulae to adjust intraocular pressure measured by tonometry for central corneal thickness.

| Formula Name<br>(adjusted for IOP) | Formula                                                                                                                                                      |
|------------------------------------|--------------------------------------------------------------------------------------------------------------------------------------------------------------|
| Ehlers <sup>11</sup>               | $\text{IOP} - \left[ \frac{5.0 * \left( \frac{\text{CCT}}{1000} - 0.520 \right)}{0.070} \right]$                                                             |
| Whitacre <sup>12</sup>             | $\text{IOP} - \left[ \frac{2.0 * \left( \frac{\text{CCT}}{1000} - 0.520 \right)}{0.100} \right]$                                                             |
| Orsengo/Pye <sup>13</sup>          | $\text{IOP} = \frac{\text{IOP}}{K}, \text{ where}$                                                                                                           |
| i.                                 | $K = \left( \frac{B1 - C1 + C}{B} \right)$                                                                                                                   |
| ii.                                | $B1 = 0.6 * \pi * 7.8 * \left( 7.8 - \frac{0.580}{2} \right) * \left( \frac{\sqrt{(1 - 0.49^2)}}{0.580^2} \right)$                                           |
| iii.                               | $B = 0.6 * \pi * 7.8 * \left( 7.8 - \frac{\text{CCT}}{1000 * 2} \right) * \left[ \frac{\sqrt{1 - 0.49^2}}{\left( \frac{\text{CCT}}{1000} \right)^2} \right]$ |
| iv.                                | $C1 = \pi * 7.8 * \left( 7.8 - \frac{0.580}{2} \right)^2 * \left[ \frac{(1 - 0.49)}{7.35 * 0.580} \right]$                                                   |
| v.                                 | $C = \pi * 7.8 * \left( 7.8 - \frac{\text{CCT}}{1000 * 2} \right)^2 * \left[ \frac{(1 - 0.49)}{7.35 * \frac{\text{CCT}}{1000}} \right]$                      |
| Doughty <sup>14</sup>              | $\text{IOP} - \left[ \frac{2.5 * \left( \frac{\text{CCT}}{1000} - 0.535 \right)}{0.05} \right]$                                                              |
| Kohlhaas <sup>15</sup>             | $\text{IOP} + (23.28 - 0.0423 * \text{CCT})$                                                                                                                 |

IOP = intraocular pressure; CCT = central corneal thickness,  $\pi = 3.14159265$
