# Supplementary material
Source: PubMed Central journal article supplement (PMC3184359)
Supplement: NIHMS285500-supplement-02.pdf [file NIHMS285500-supplement-02.pdf]

Table 2: Baseline predictors (mean, standard deviation) and adjusted intraocular pressure by primary open-angle glaucoma status.

|                                                          | Not POAG<br>N=1290 |      | POAG<br>N=143 |      |
|----------------------------------------------------------|--------------------|------|---------------|------|
|                                                          | Mean               | SD   | Mean          | SD   |
| Age at baseline (years)                                  | 55.2               | 9.5  | 58.8          | 9.0  |
| Vertical cup-to-disc ratio at baseline                   | 0.4                | 0.2  | 0.5           | 0.2  |
| Pattern standard deviation at baseline (dB)              | 1.9                | 0.2  | 2.0           | 0.2  |
| Central corneal thickness ( $\mu\text{m}$ )              | 574.9              | 37.8 | 551.4         | 37.8 |
| Unadjusted baseline IOP (mm Hg)                          | 24.8               | 2.7  | 25.7          | 3.0  |
| Ehlers <sup>11</sup> adjusted baseline IOP (mm Hg)       | 20.9               | 3.8  | 23.5          | 4.1  |
| Whitacre <sup>12</sup> adjusted baseline IOP (mm Hg)     | 23.7               | 2.8  | 25.1          | 3.1  |
| Orssengo/Pye <sup>13</sup> adjusted baseline IOP (mm Hg) | 25.3               | 3.7  | 27.8          | 4.3  |
| Doughty <sup>14</sup> adjusted baseline IOP (mm Hg)      | 22.8               | 3.3  | 24.9          | 3.6  |
| Kohlhaas <sup>15</sup> adjusted baseline IOP (mm Hg)     | 23.8               | 3.1  | 25.7          | 3.5  |

SD = standard deviation; POAG = primary open-angle glaucoma; IOP = intraocular pressure.
